# Supplementary material for: Insight into the in-cloud formation of oxalate based on in situ measurement by single particle mass spectrometry
Source: Copernicus journal article supplement (doi:10.5194/acp-2017-763), 2017-08-18
Supplement: Supplementary file 1 [file acp-2017-763-supplement.pdf]

1 **Insight into the in-cloud formation of oxalate based on in-situ measurement by single**  
2 **particle mass spectrometry**

3

4 Guohua Zhang<sup>1</sup>, Qin hao Lin<sup>1,2</sup>, Long Peng<sup>1,2</sup>, Yuxiang Yang<sup>1,2</sup>, Yuzhen Fu<sup>1,2</sup>, Xinhui Bi<sup>1,\*</sup>,  
5 Mei Li<sup>3</sup>, Duohong Chen<sup>4</sup>, Jianxin Chen<sup>5</sup>, Zhang Cai<sup>6</sup>, Xinming Wang<sup>1</sup>, Ping'an Peng<sup>1</sup>,  
6 Guoying Sheng<sup>1</sup>, Zhen Zhou<sup>3</sup>

7

8 <sup>1</sup> State Key Laboratory of Organic Geochemistry and Guangdong Key Laboratory of  
9 Environmental Resources Utilization and Protection, Guangzhou Institute of Geochemistry,  
10 Chinese Academy of Sciences, Guangzhou 510640, PR China

11 <sup>2</sup> University of Chinese Academy of Sciences, Beijing 100039, PR China

12 <sup>3</sup> Atmospheric Environment Institute of Safety and Pollution Control, Jinan University,  
13 Guangzhou 510632, PR China

14 <sup>4</sup> State Environmental Protection Key Laboratory of Regional Air Quality Monitoring,  
15 Guangdong Environmental Monitoring Center, Guangzhou 510308, PR China

16 <sup>5</sup> Shaoguan Environmental Monitoring Center, Shaoguan 512026, PR China

17 <sup>6</sup> John and Willie Leone Family Department of Energy and Mineral Engineering, The  
18 Pennsylvania State University, University Park, PA 16802, USA

19 **Instrumentation**

20 **SPAMS**

21 Individual particles are introduced into SPAMS through a critical orifice. They are  
22 focused and accelerated to specific velocities, which are determined by two continuous  
23 diode Nd:YAG laser beams (532 nm). Based on the measured velocities, a pulsed laser  
24 (266 nm) downstream is trigger to desorp/ionize the particles. The produced positive and  
25 negative molecular fragments are recorded. In summary, a velocity, a detection moment,  
26 and an ion mass spectrum are recorded for each ionized particle, while there is no mass  
27 spectrum for not ionized particles. The velocity could be converted to  $d_{va}$  based on a  
28 calibration using polystyrene latex spheres (PSL, Duke Scientific Corp., Palo Alto) with  
29 predefined sizes.

30 Table S1. Correlation analysis between the hourly detected number for species in cloud-  
 31 free particles (N = 109) and *cloud RES* particles (N = 123). Most of the analysis shows  
 32 significant correlation ( $p < 0.001$ ) between the species, with the  $R^2$  shown as follows.  
 33 Results without significant correlation are marked with superscripts a and b.  
 34

|                | <b>m/z -45</b>    | <b>m/z -59</b>    | <b>m/z -71</b>             | <b>m/z -73</b>    | <b>m/z -89</b>                  | <b>K.rich</b> |
|----------------|-------------------|-------------------|----------------------------|-------------------|---------------------------------|---------------|
| <b>m/z -45</b> | 1                 |                   |                            |                   |                                 |               |
| <b>m/z -59</b> | 0.92/ <b>0.93</b> | 1                 |                            |                   |                                 |               |
| <b>m/z -71</b> | 0.77/ <b>0.33</b> | 0.92/ <b>0.35</b> | 1                          |                   |                                 |               |
| <b>m/z -73</b> | 0.94/ <b>0.81</b> | 0.92/ <b>0.86</b> | 0.80/ <b>0.20</b>          | 1                 |                                 |               |
| <b>m/z -89</b> | 0.22/ <b>0.32</b> | 0.38/ <b>0.45</b> | 0.46/ <b>0.12</b>          | 0.33/ <b>0.64</b> | 1                               |               |
| <b>K.rich</b>  | 0.52/ <b>0.58</b> | 0.33/ <b>0.59</b> | 0.21/ <b>0<sup>a</sup></b> | 0.57/ <b>0.72</b> | 0.05 <sup>b</sup> / <b>0.41</b> | 1             |

35

36 <sup>a</sup>  $p = 0.37$ ; <sup>b</sup>  $p = 0.009$ .

37 Table S2. Number fraction (%) of ion peaks for organic acids associated with all the  
38 detected particles and K-rich particles, respectively.

39

40

| <b>Ion peaks</b> | <b>All the detected<br/>particles (%)</b> | <b>K-rich particles<br/>(%)</b> |
|------------------|-------------------------------------------|---------------------------------|
| <b>m/z -45</b>   | 12.4 ± 0.1                                | 21.5 ± 0.3                      |
| <b>m/z -59</b>   | 8.6 ± 0.1                                 | 16.5 ± 0.3                      |
| <b>m/z -71</b>   | 2.8 ± 0.1                                 | 5.6 ± 0.1                       |
| <b>m/z -73</b>   | 12.6 ± 0.1                                | 22.5 ± 0.3                      |

42 Table S3. Number fraction (%) of the major OAs relative to all the detected particles  
43 during each cloud event.

44

| <b>Ion peaks</b> | <b>Cloud I</b> | <b>Cloud II</b> | <b>Cloud III</b> |
|------------------|----------------|-----------------|------------------|
| <b>m/z -45</b>   | 16.5 ± 11.1    | 4.8 ± 1.2       | 8.6 ± 4.7        |
| <b>m/z -59</b>   | 16.0 ± 9.6     | 3.9 ± 1.2       | 8.6 ± 5.5        |
| <b>m/z -71</b>   | 8.7 ± 7.3      | 0.6 ± 0.4       | 4.0 ± 4.1        |

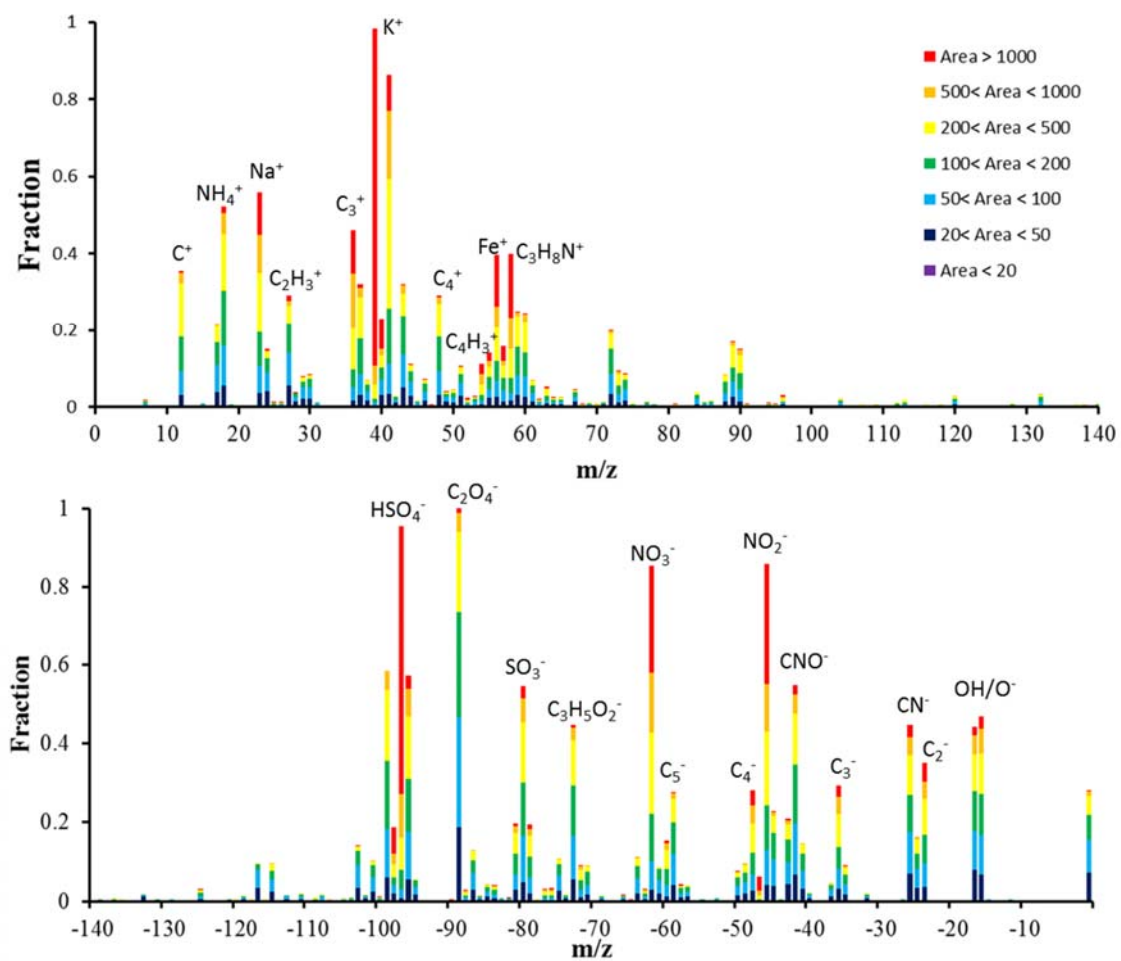

46

47 **Figure S1.** The number-based digitized mass spectrum of all the detected oxalate-  
 48 containing particles.

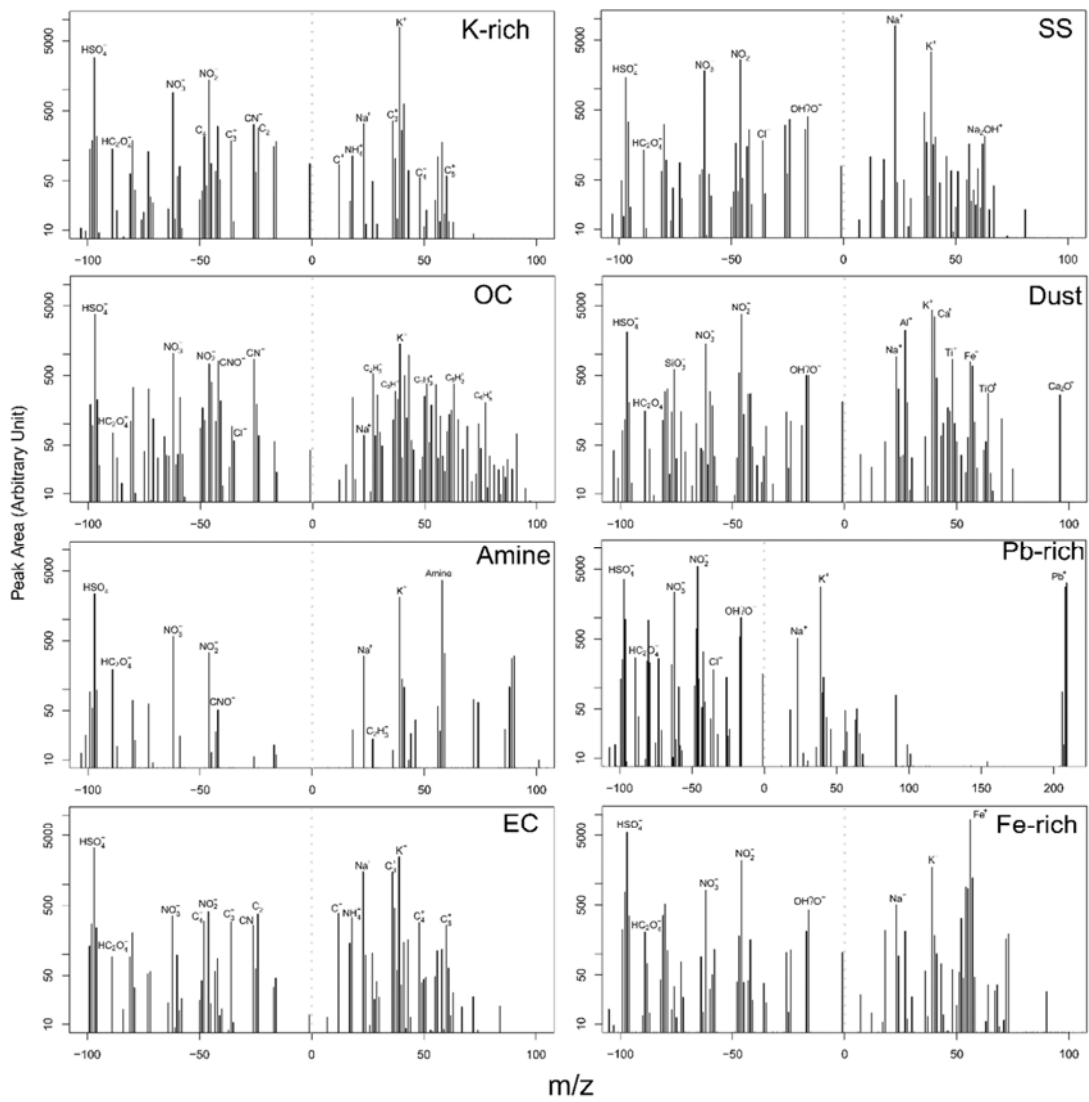

49

50 Figure S2. Average mass spectra for each particle type of oxalate-containing particles.

51 Representative ions peaks were labeled for each particle types.

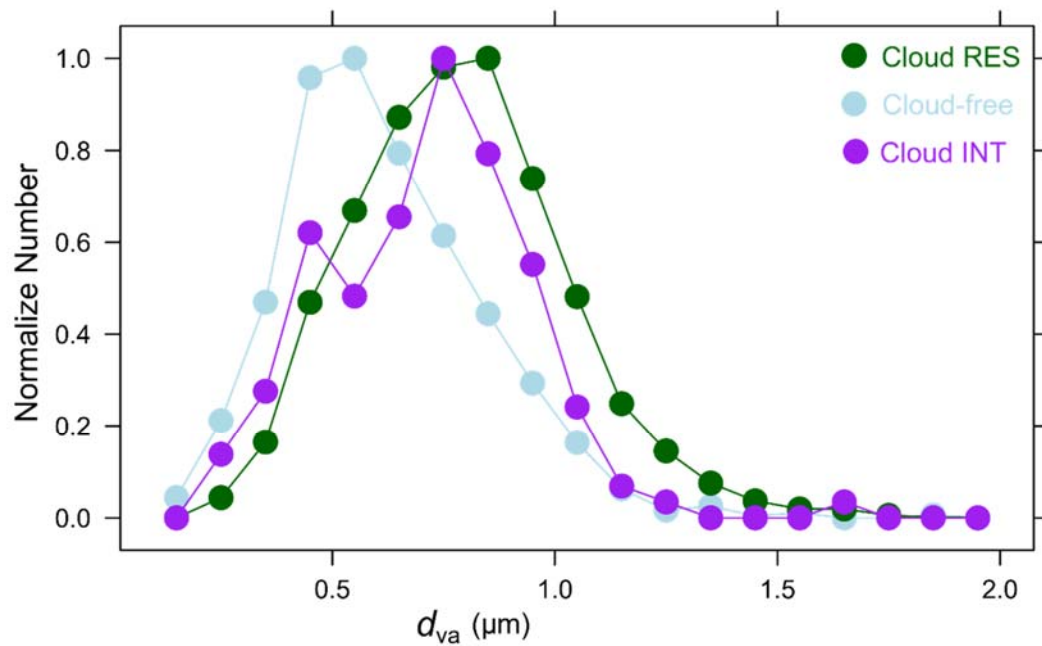

52

53 Figure S3. The normalized unscaled number size distribution of oxalate-containing  
 54 particles in cloud-free, RES, and INT particles, respectively.



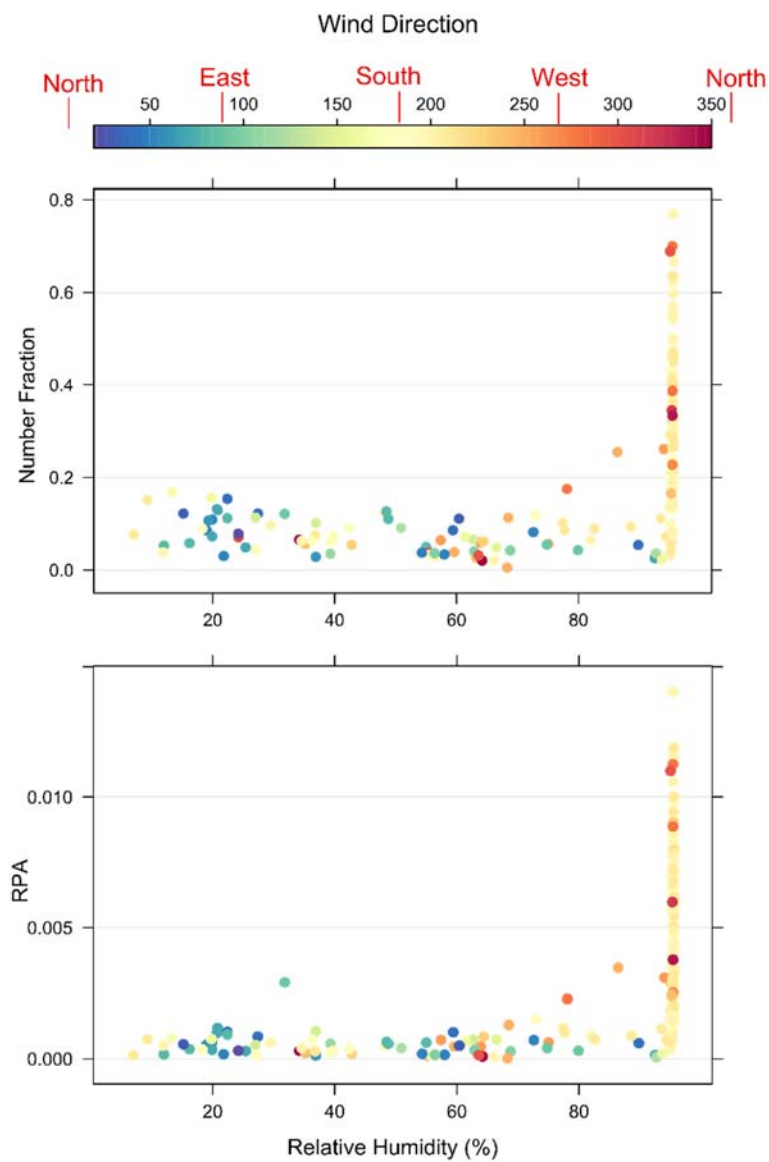

55  
56

57 Figure S4. Scattering plots of (a) the number fraction and (b) the RPA of the oxalate-  
58 containing particles versus relative humidity. The coloration indicates the wind direction.

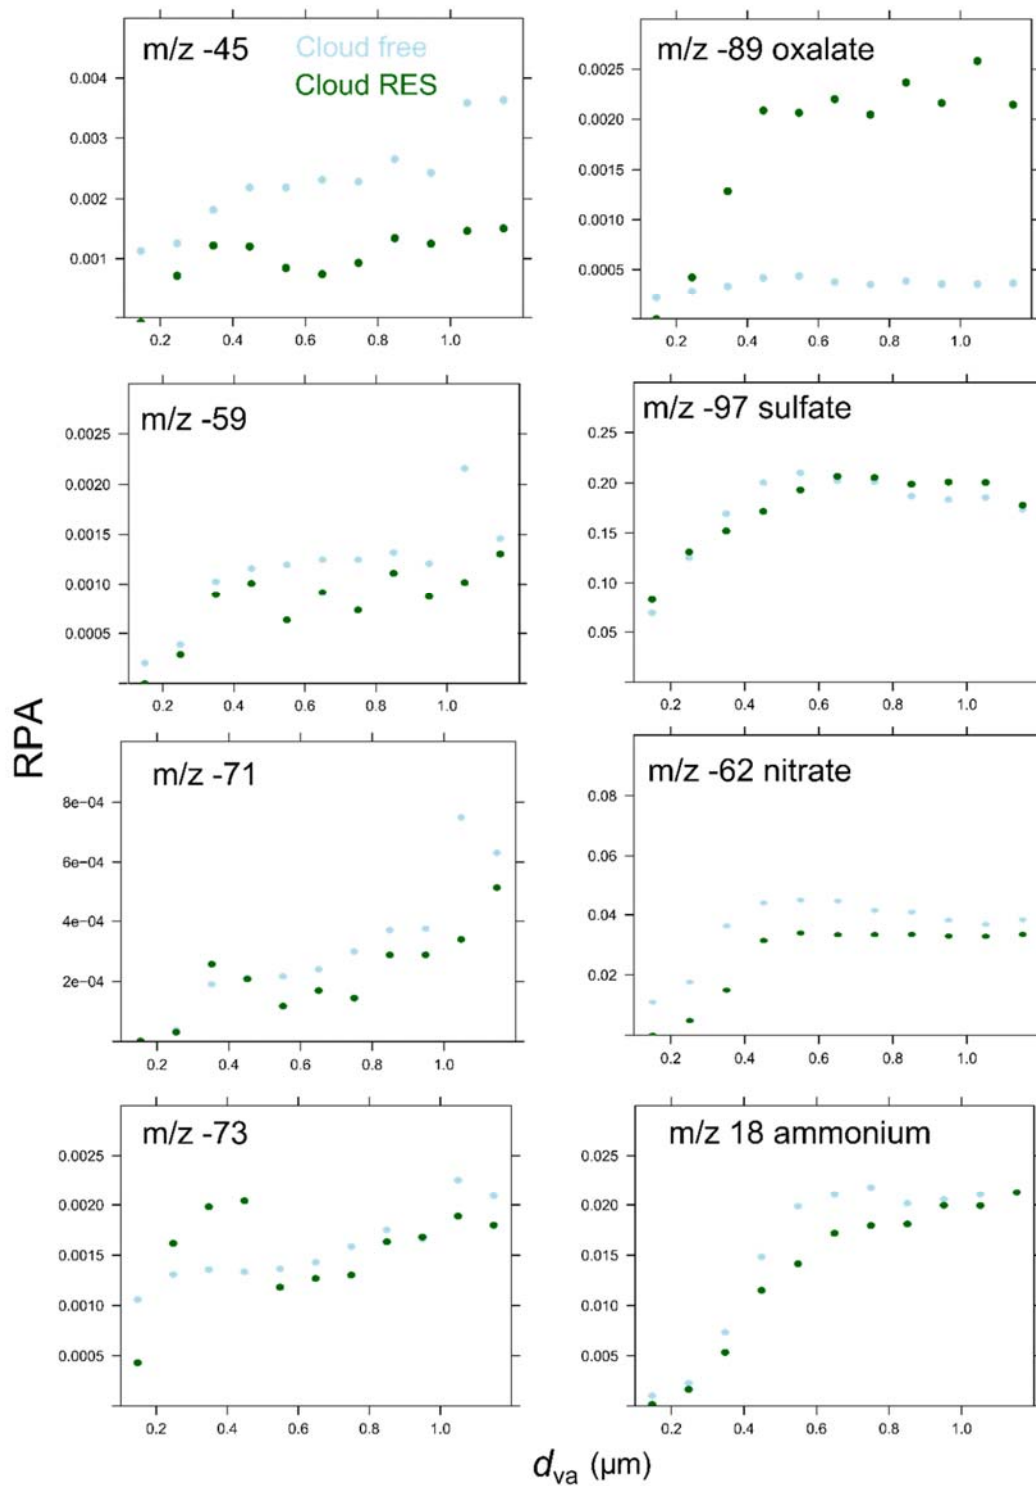

59

60 Figure S5. Size-resolved distribution of RPAs for each species in the cloud-free and RES  
 61 particles.

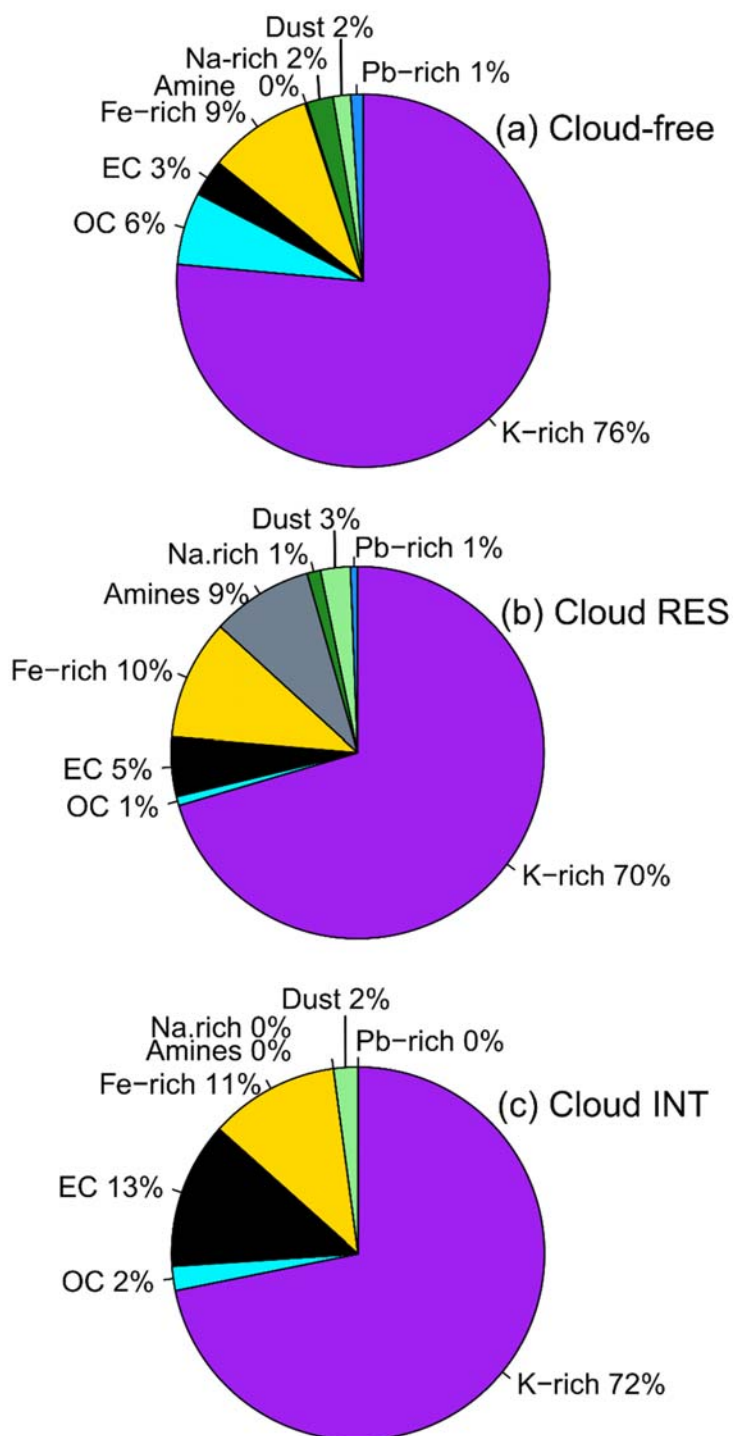

62

63 Figure S6. Number fraction of each oxalate-containing particle type for the (a) cloud-free,

64 (b) RES, and (c) INT particles, respectively.

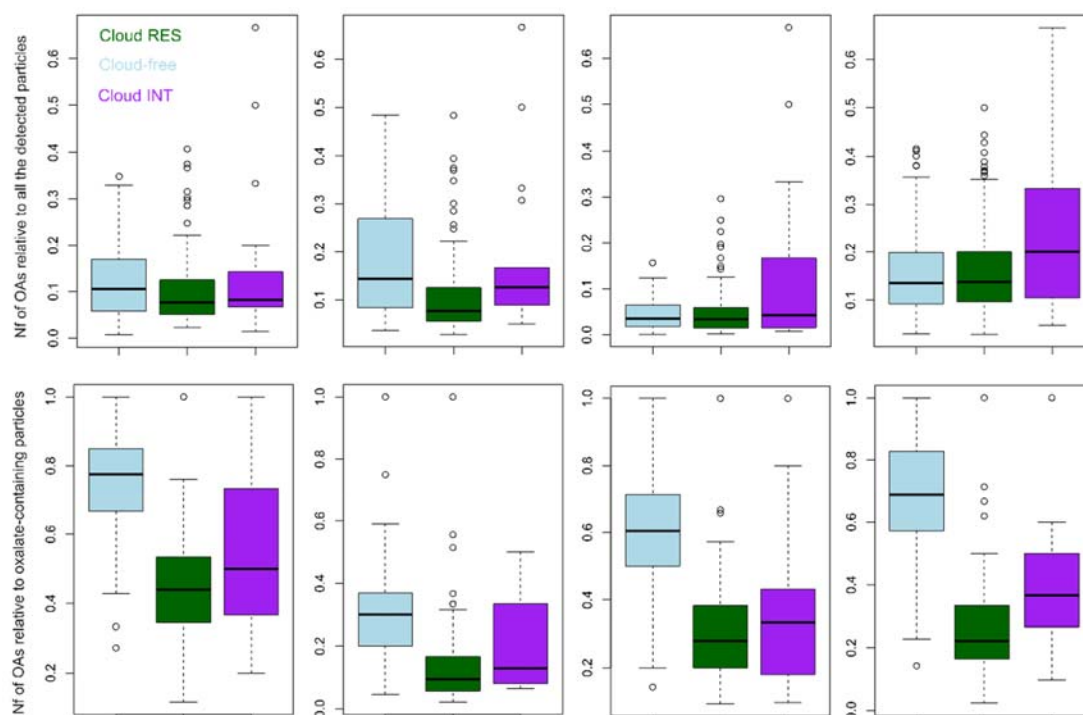

65  
66

67 Figure S7. Box and whisker plot of the variations of number fractions for four OAs in (a-  
68 d) all the detected particles, and (e-h) oxalate-containing particles, separated for cloud-free,  
69 RES, and INT particles, respectively. In a box and whisker plot, the lower, median and  
70 upper line of the box denote the 25, 50, and 75 percentiles, respectively; the lower and  
71 upper edges of the whisker denote the 10 and 90 percentiles, respectively.
